# Supplementary material
Source: PubMed Central journal article supplement (PMC1735501)
Supplement: jmedgene_40_6_399__1.pdf [file jmedgene_40_6_399__1.pdf]

**Appendix 2A** Total number of samples used in the study by population, cleft status, and gene region<sup>a</sup>

| Gene Region                        | Cases             |                  |       |     |           |     | Controls |                |     |       |           |       |
|------------------------------------|-------------------|------------------|-------|-----|-----------|-----|----------|----------------|-----|-------|-----------|-------|
|                                    | South American    |                  | Asian |     | Caucasian |     | Total    | South American |     | Asian | Caucasian | Total |
|                                    | CL/P <sup>b</sup> | CPO <sup>c</sup> | CL/P  | CPO | CL/P      | CPO |          | CL/P           | CPO |       |           |       |
| 5'UTR                              | 209               | 24               | 91    | -   | 93        | -   | 417      | -              | 152 | 100   | 252       |       |
| EXON1                              | 209               | 24               | 311   | 28  | 304       | 43  | 919      | 57             | 716 | 270   | 1043      |       |
| INTRON                             | -                 | -                | 91    | -   | 93        | -   | 184      | -              | 152 | 100   | 252       |       |
| INTRONIC HOMOLOGY<br>REGION (MIHR) | 209               | 24               | 311   | 28  | 304       | 43  | 919      | -              | 152 | 100   | 252       |       |
| EXON 2                             | 209               | 24               | 311   | 28  | 304       | 43  | 919      | 57             | 152 | 270   | 479       |       |
| 3'UTR                              | 209               | 24               | 91    | -   | 93        | -   | 417      | -              | 152 | 100   | 252       |       |

<sup>a</sup> Differences between numbers in Electronic Appendices 2A and 2B are due to individual sample success in different regions

<sup>b</sup> CL/P - Cleft lip with or without cleft palate

<sup>c</sup> CPO - Cleft palate only
