# Supplementary material
Source: PubMed Central journal article supplement (PMC1735501)
Supplement: jmedgene_40_6_399__2.pdf [file jmedgene_40_6_399__2.pdf]

**Appendix 2B** Case-Control Frequency of the MSX1 Mutations and Polymorphisms Diagnosed in this Study

| Nucleotide | Variant Frequency <sup>a</sup> /Population | "100" | CL/P   | CPO   | Control |
|------------|--------------------------------------------|-------|--------|-------|---------|
| 5'utr      |                                            |       |        |       |         |
| 223        | South American                             | -     | 0/132  | 0/14  | -       |
| - 247C>T   | Caucasian                                  | 1/139 | 1/129  | 0/10  | 0/172   |
|            | Asian                                      | 0/146 | 0/146  | -     | -       |
| 303        | South American                             | -     | 0/132  | 0/14  | -       |
| -167C>T    | Caucasian                                  | 0/140 | 0/130  | 0/10  | 1/171   |
|            | Asian                                      | 0/146 | 0/146  | -     | -       |
| 339        | South American                             | -     | 1/127  | 0/8   | -       |
| - 130C>G   | Caucasian                                  | 0/140 | 0/130  | 0/10  | 13/157  |
|            | Asian                                      | 0/146 | 0/146  | -     | -       |
| 434        | South American                             | -     | 2/200  | 0/18  | 0/108   |
| - 36G>A    | Caucasian                                  | 9/139 | 20/284 | 7/91  | 15/271  |
|            | Asian                                      | 0/146 | 0/298  | 0/46  | -       |
| Exon 1     |                                            |       |        |       |         |
| 516        | South American                             | -     | 0/202  | 0/18  | 2/106   |
| 47G>A      | Caucasian                                  | 0/48  | 0/214  | 0/88  | 0/306   |
|            | Asian                                      | 0/142 | 0/432  | 0/48  | -       |
| 537        | South American                             | -     | 1/201  | 0/18  | 4/104   |
| 68C>T      | Caucasian                                  | 0/48  | 0/224  | 0/88  | 0/306   |
|            | Asian                                      | 0/142 | 0/438  | 0/48  | -       |
| 559        | South American                             | -     | 0/202  | 0/18  | 0/108   |
| 90C>A      | Caucasian                                  | 0/48  | 0/224  | 0/88  | 0/308   |
| A30A       | Asian                                      | 0/142 | 1/437  | 0/48  | -       |
| 570        | South American                             | -     | 1/201  | 1/17  | 5/103   |
| 101C>G     | Caucasian                                  | 12/36 | 35/189 | 17/71 | 57/251  |
|            | Asian                                      | 5/137 | 15/423 | 3/45  | 4/102   |
| 702        | South American                             | -     | 0/352  | 0/32  | 0/108   |
| 233A>T     | Caucasian                                  | 0/48  | 0/224  | 0/88  | 0/310   |
| E78V       | Asian                                      | 0/142 | 3/435  | 0/48  | 1/671   |

|            |                |        |        |       |        |
|------------|----------------|--------|--------|-------|--------|
| 709        | South American | -      | 1/351  | 0/32  | 0/108  |
| 240G>A     | Caucasian      | 0/48   | 0/224  | 0/88  | 0/310  |
| V80V       | Asian          | 0/142  | 0/438  | 0/48  | 0/352  |
| 741        | South American | -      | 0/352  | 0/32  | 0/108  |
| 272G>A     | Caucasian      | 0/48   | 0/224  | 0/88  | 0/310  |
| G91D       | Asian          | 0/142  | 1/437  | 0/48  | -      |
| 799        | South American | -      | 3/349  | 0/32  | 7/101  |
| 330C>T     | Caucasian      | 7/81   | 15/209 | 7/81  | 25/285 |
| G110G      | Asian          | 19/123 | 63/373 | 11/37 | 8/98   |
| 810        | South American | -      | 0/352  | 0/32  | 0/108  |
| 341T>G     | Caucasian      | 0/48   | 1/223  | 0/88  | 0/310  |
| V114G      | Asian          | 0/142  | 0/436  | 0/48  | -      |
| 816        | South American | -      | 1/351  | 0/32  | 0/108  |
| 347G>A     | Caucasian      | 0/48   | 0/224  | 0/88  | 0/310  |
| G116E      | Asian          | 0/142  | 0/436  | 0/48  | -      |
| 823        | South American | -      | 1/351  | 0/32  | 0/108  |
| 354C>T     | Caucasian      | 0/48   | 0/224  | 0/88  | 0/310  |
| L118L      | Asian          | 0/142  | 0/436  | 0/48  | -      |
| Intron 1   |                |        |        |       |        |
| 961-971    | South American | -      | 22/80  | 0/6   | -      |
| 451+(41-   | Caucasian      | -      | 81/227 | 25/31 | 19/41  |
| 1139       | Caucasian      | 36/112 | 33/43  | 3/9   | -      |
| 451+219G>A | Asian          | 6/160  | 6/160  | -     | -      |
| 1152       | Caucasian      | 14/90  | 14/80  | 0/10  | -      |
| 451+232A>T | Asian          | 105/47 | 105/47 | -     | -      |
| 1188       | Caucasian      | 0/104  | 0/94   | 0/10  | -      |
| 451+232C>T | Asian          | 1/175  | 1/175  | -     | -      |
| 1259-1262  | Caucasian      | 0/164  | 0/146  | 0/18  | -      |
| 451+(339-  | Asian          | 6/172  | 6/172  | -     | -      |
| 1325       | Caucasian      | 16/152 | 12/136 | 4/14  | -      |
| 451+405G>A | Asian          | 12/156 | 12/156 | -     | -      |

|             |                |        |        |            |                 |
|-------------|----------------|--------|--------|------------|-----------------|
| 1348        | Caucasian      | 9/159  | 9/141  | 0/18       | -               |
| 451+428C>T  | Asian          | 16/152 | 16/152 | -          | -               |
| 1440        | Caucasian      | 7/161  | 7/143  | 0/18       | -               |
| 451+520C>T  | Asian          | 18/160 | 18/160 | -          | -               |
| 1510        | Caucasian      | 53/121 | 51/107 | 2/14       | -               |
| 451+590G>C  | Asian          | 61/17  | 61/17  | -          | -               |
| 1807        | South American | -      | 0/202  | 0/18       | -               |
| 451+887G>T  | Caucasian      | 0/178  | 0/412  | 1/77       | 0/194           |
|             | Asian          | 0/94   | 0/294  | 0/48       | 0/194           |
| 1966        | South American | -      | 0/202  | 0/18       | -               |
| 451+1046C>T | Caucasian      | 0/178  | 0/412  | 1/77       | 0/194           |
|             | Asian          | 0/94   | 0/294  | 0/48       | 0/210           |
| 2121        | Caucasian      | 48/120 | 42/108 | 6/12       | 37/147          |
| 451+1201T>G | Asian          | 6/176  | 7/175  | -          | -               |
| 2450        | South American | -      |        | 0/34/1/8/3 | -               |
| 452-780     | Caucasian      | -      |        |            | 0/310/37/139/64 |
| CA 8-12     | Asian          | -      |        |            | 2/1162/3/265/60 |
| 2564        | Caucasian      | 43/121 | 35/97  | 4/14       | 120/127         |
| 452-683C>A  | Asian          | 115/65 | 115/65 | -          | -               |
| 2573        | Caucasian      | 0/164  | 0/132  | 0/18       | -               |
| 452-674G>A  | Asian          | 2/178  | 2/178  | -          | -               |
| 2580        | Caucasian      | 111/53 | 97/49  | 14/4       | 116/57          |
| 452-667T>G  | Asian          | 45/133 | 45/133 | -          | -               |
| 2845        | Caucasian      | 45/123 | 41/109 | 4/14       | -               |
| 452-402G>T  | Asian          | 112/66 | 112/66 | -          | -               |
| 3049        | South American | -      | 0/216  | 0/28       | -               |
| 452-198A>G  | Caucasian      | 12/156 | 11/185 | 3/17       | -               |
|             | Asian          | 0/178  | 0/178  | -          | -               |

|              |                |          |          |       |        |
|--------------|----------------|----------|----------|-------|--------|
| 3095         | Caucasian      | 8/160    | 13/181   | 0/20  | -      |
| 452-152A>G   | Asian          | 2/176    | 2/176    | -     | -      |
| 3118         | South American | -        | 0/216    | 0/28  | -      |
| 452-129G>A,C | Caucasian      | 1/10/185 | 1/10/185 | 3/17  | -      |
|              | Asian          | 2/176    | 2/176    | -     | -      |
| 3120         | South American | -        | 0/216    | 0/28  | -      |
| 452-127 C>A  | Caucasian      | 36/134   | 37/187   | 3/25  | 23/155 |
|              | Asian          | 6/176    | 6/202    | 0/4   | -      |
| 3200         | Caucasian      | 34/96    | 41/165   | 3/19  | -      |
| 452-47 A>G   | Asian          | 8/172    | 2/338    | 0/44  | -      |
| 3232         | Caucasian      | 3/11     | 63/175   | 9/13  | 8/14   |
| 452-15delT   | Asian          | 3/89     | 8/234    | 3/45  | -      |
| 3233         | Caucasian      | 0/24     | 1/238    | 0/22  | -      |
| 452-14insC   | Asian          | 0/92     | 0/242    | 0/48  | -      |
| Exon 2       |                |          |          |       |        |
| 3248         | South American | -        | 0/216    | 0/28  | -      |
| 453G>T       | Caucasian      | 0/44     | 0/314    | 0/32  | 0/78   |
| R151S        | Asian          | 0/50     | 0/264    | 0/50  | 0/36   |
| 3338         | South American | -        | 0/216    | 0/28  | -      |
| 543G>A       | Caucasian      | 1/73     | 4/400    | 0/32  | 3/91   |
| L181L        | Asian          | 0/96     | 0/264    | 0/50  | 0/58   |
| 3620         | South American | -        | 0/216    | 0/28  | -      |
| 825C>T       | Caucasian      | 0/76     | 0/412    | 0/32  | 0/142  |
| A275A        | Asian          | 0/96     | 1/263    | 0/50  | 0/54   |
| 3695         | South American | -        | 29/187   | 3/25  | -      |
| *6C>T        | Caucasian      | 17/59    | 98/308   | 15/25 | 24/80  |
|              | Asian          | 3/91     | 8/254    | 3/47  | 3/39   |
| 3'utr        |                |          |          |       |        |
| 3758         | South American | -        | 9/207    | 0/28  | -      |
| *69C>T       | Caucasian      | 0/20     | 2/94     | -     | -      |
|              | Asian          | 11/25    | 11/25    | -     | -      |

|               |                |       |         |      |        |
|---------------|----------------|-------|---------|------|--------|
| 3760          | South American | -     | 1/215   | 0/28 | -      |
| *71C>T        | Caucasian      | 0/20  | 0/96    | -    | -      |
|               | Asian          | 0/36  | 0/36    | -    | -      |
| 3969          | Caucasian      | 10/16 | 10/16   | -    | -      |
| *280A>G       | Asian          | 22/12 | 22/12   | -    | -      |
| 4401          | South American | -     | 0/216   | 0/28 | -      |
| *712T>A       | Caucasian      | 0/126 | 0/108   | 0/18 | 0/96   |
|               | Asian          | 1/167 | 1/167   | -    | -      |
| 4500          | South American | -     | 117/207 | 9/19 | -      |
| *(811-816)del | Caucasian      | 40/86 | 34/74   | 6/12 | 31/121 |
|               | Asian          | 8/164 | 8/164   | -    | -      |

Notes: <sup>a</sup>Number of variants is number of chromosomes for each allele type, not individuals; <sup>b</sup>CL/P, from patients with nonsyndromic cleft lip with or without cleft palate; <sup>c</sup>CPO, from patients with nonsyndromic cleft of the palate only.
