# Supplementary material
Source: PubMed Central journal article supplement (PMC1735501)
Supplement: jmedgene_40_6_399__3.pdf [file jmedgene_40_6_399__3.pdf]

**Appendix 1** Primer Locations at *MSX1* Locus.

| PCR Product Size | Start | End  | Primer Sequences            | PCR Conditions                                                                                |
|------------------|-------|------|-----------------------------|-----------------------------------------------------------------------------------------------|
| A - 491          | 2     | 21   | CTTCAGCGCAGAGGAAAGTT        | 94°C 5 min (1 cycle), 94°C 30 sec, 57°C 45 sec, 72°C 1 min 30 sec (35 cycles)                 |
| B - 851          | 473   | 492  | ACACCGAGTGGCAAAGAAGT        | 94°C 3 min (1 cycle), 94°C 30 sec, 63°C 30 sec, 72°C 2 min (40 cycles), 72°C 3 min (1 cycle)  |
|                  | 414   | 433  | TGGCCAGTGCTGCGGCAGAA        |                                                                                               |
| C - 355          | 1246  | 1264 | ATTCATCCGCTGGGGTGAA         | 94°C 3 min (1 cycle), 94°C 30 sec, 55°C 30 sec, 72°C 30 sec (40 cycles)                       |
|                  | 1207  | 1226 | CATGATCCCTCATCTGATCC        |                                                                                               |
| D - 659          | 1552  | 1572 | CCACTTTAATGGCTCAGTCCT       | 94°C 2 min (1 cycle), 94°C 30 sec, 57°C 30 sec, 72°C 1 min 40 sec (40 cycles)                 |
|                  | 1490  | 1508 | GGGCACCAAGTCAATTAGG         |                                                                                               |
| E - 597          | 2129  | 2148 | TCCCGGCAGAAAGTGAATTC        | 94°C 3 min (1 cycle), 94°C 30 sec, 55°C 30 sec, 72°C 30 sec (40 cycles)                       |
|                  | 2090  | 2109 | TACTTAGGCAAAACCCGCGT        |                                                                                               |
|                  | 2667  | 2686 | CGGGATTCTAGGAGTAGTTC        |                                                                                               |
| F - 546          | 2622  | 2638 | TGCACCCTCCATGATGG           | 94°C 3 min (1 cycle), 94°C 30 sec, 55°C 30 sec, 72°C 30 sec (40 cycles)                       |
| G - 799          | 3146  | 3167 | AGCCAAACAATACCAGATATTG      | 94°C 2 min (1 cycle), 94°C 30 sec, 57°C 30 sec, 72°C 1 min 40 sec (40 cycles)                 |
|                  | 2941  | 2961 | AGGTGATTTACATCTTCCCA        |                                                                                               |
|                  | 3722  | 3739 | ACCAGGGCTGGAGGAATC          |                                                                                               |
| H - 922          | 3587  | 3604 | TGTACCACCTGACATAGA          | 94°C 3 min (1 cycle), 94°C 30 sec, 55°C 30 sec, 72°C 30 sec (35 cycles), 72°C 3 min (1 cycle) |
|                  | 4479  | 4505 | AAAATAAAAGACTCAATCAGTAAAGAG |                                                                                               |
